# Supplementary material for: The highly pathogenic H7N3 avian influenza strain from July 2012 in Mexico acquired an extended cleavage site through recombination with host 28S rRNA
Source: PubMed Central journal article supplement (PMC3673898; doi:10.1186/1743-422x-10-139), 2013-05-01
Supplement: 1743-422X-10-139-S1.pdf [file 1743-422X-10-139-S1.pdf]

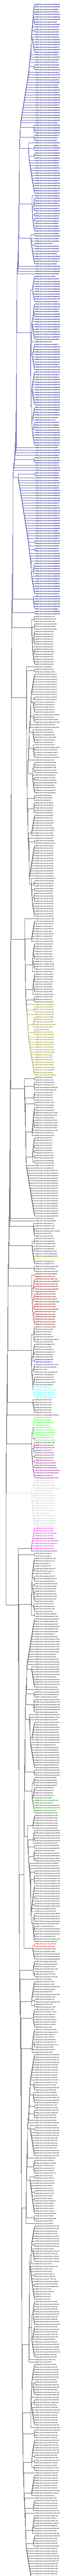

### Legend

- H7N1 H7N7 1901-1945 Europe 1993 Japan Egypt Taiwan
- H7N7 1956-1977 Europe USA SouthAmerica
- H7N3 1963 England
- H7N3 H7N4 H7N7 1976-1997 Australia
- H7N7 1979 Germany
- H7N3 1995-2004 Pakistan
- H7N1 1994 USA
- H7N1 1999-2000 Italy
- H7N1 2002 Chile
- H7N3 2003 Netherlands
- H7N3 2004-2005 Canada
- H7N3 2007 Mexico
